# Supplementary material for: Avocado Fruit on Postprandial Markers of Cardio-Metabolic Risk: A Randomized Controlled Dose Response Trial in Overweight and Obese Men and Women
Source: PubMed Central journal article supplement (PMC6164649; doi:10.3390/nu10091287), 2018-09-12
Supplement: nutrients-10-01287-s001.pdf [file nutrients-10-01287-s001.pdf]

# SUPPLEMENTAL MATERIALS

Intended for publication

**Table S1.** Lipoprotein metabolism using NMR analyses by racial/ethnic group \*

| NMR Analysis                              | Racial/Ethnic group | Control Meal | Whole-Avocado Meal | <b>P value<br/>Con vs Whole-A</b> |
|-------------------------------------------|---------------------|--------------|--------------------|-----------------------------------|
| Large HDL Particle Concentration (nmol/L) | African-American    | 8.3 ± 0.1    | 8.5 ± 0.1          | 0.37                              |
|                                           | Asian               | 8.6 ± 0.2    | 8.0 ± 0.2          | 0.005                             |
|                                           | Hispanic            | 7.8 ± 0.2    | 8.2 ± 0.2          | 0.07                              |
|                                           | Caucasian           | 8.1 ± 0.1    | 8.6 ± 0.1          | 0.001                             |
| Small HDL Particle Concentration (nmol/L) | African-American    | 14.1 ± 0.5   | 13.5 ± 0.6         | 0.27                              |
|                                           | Asian               | 13.2 ± 0.9   | 14.4 ± 0.9         | 0.21                              |
|                                           | Hispanic            | 13.7 ± 1.0   | 10.6 ± 0.9         | 0.003                             |
|                                           | Caucasian           | 14.1 ± 0.6   | 12.5 ± 0.6         | 0.02                              |
| Small LDL Particle Concentration (nmol/L) | African-American    | 457.0 ± 20.0 | 502.9 ± 21.3       | 0.04                              |
|                                           | Asian               | 409.6 ± 32.9 | 548.1 ± 33.2       | <0.0001                           |
|                                           | Hispanic            | 484.8 ± 36   | 477.3 ± 35.4       | 0.84                              |
|                                           | Caucasian           | 468.1 ± 23.6 | 458.3 ± 23.9       | 0.69                              |
| Average HDL Particle Size (nm)            | African-American    | 9.6 ± 0.02   | 9.1 ± 0.02         | 0.04                              |
|                                           | Asian               | 9.7 ± 0.04   | 9.5 ± 0.04         | <0.0001                           |
|                                           | Hispanic            | 9.6 ± 0.04   | 9.6 ± 0.04         | 0.18                              |
|                                           | Caucasian           | 9.5 ± 0.03   | 9.6 ± 0.03         | 0.001                             |
| Average LDL Particle Size (nm)            | African-American    | 20.8 ± 0.1   | 20.7 ± 0.1         | 0.10                              |
|                                           | Asian               | 20.8 ± 0.1   | 20.7 ± 0.1         | 0.31                              |
|                                           | Hispanic            | 20.7 ± 0.1   | 20.8 ± 0.1         | 0.28                              |
|                                           | Caucasian           | 20.6 ± 0.1   | 20.8 ± 0.1         | 0.04                              |

\*All values for each variable represent mean ± SEM (n=31): African-American, n=13; Asian, n=5; Hispanic, n=4; Caucasian, n=9).

Con, Control meal; HDL, high-density lipoprotein; LDL, low-density lipoprotein; VLDL, very-low-density lipoprotein; Whole-A, Whole Avocado meal

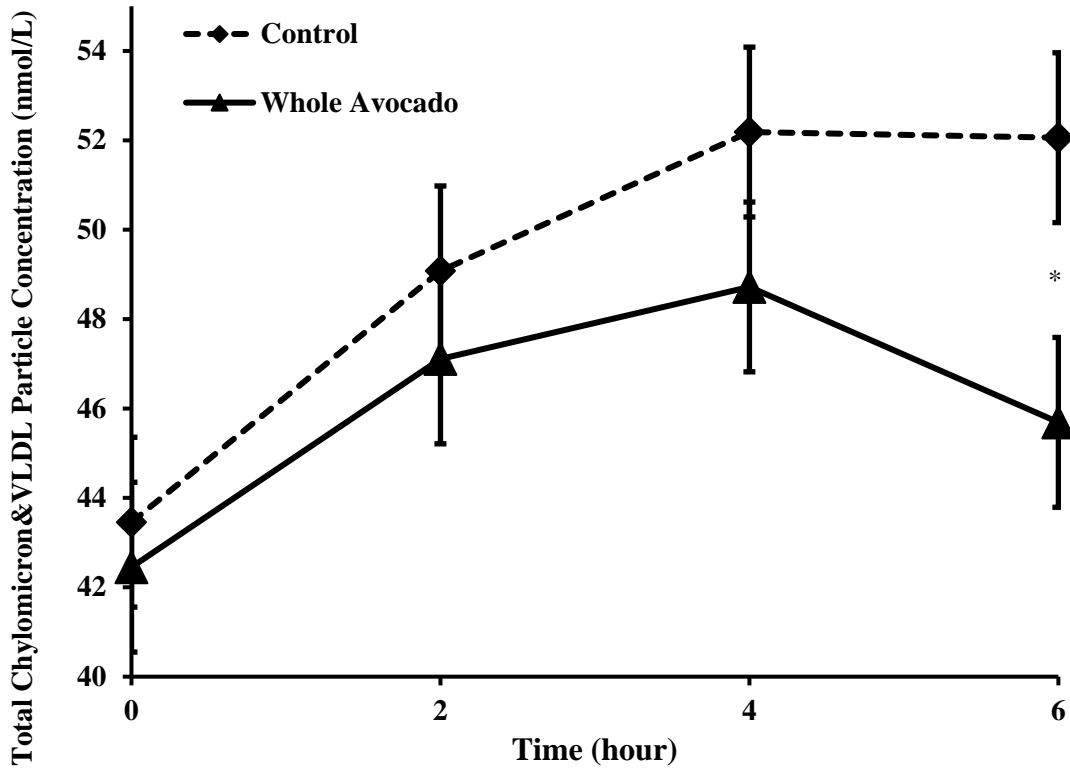

**Figure S1.** Plasma total chylomicron/VLDL particle concentrations over 6 h after consuming test breakfast meals (n=31). Data were analyzed by PROC MIXED using SAS 9.4. Main effects of meal  $p = 0.009$ , time  $p = 0.0001$ , and meal by time  $p = 0.434$ .

Data are means  $\pm$  SE, n=31. \*  $p < 0.05$  for the difference compared to the Control meal.

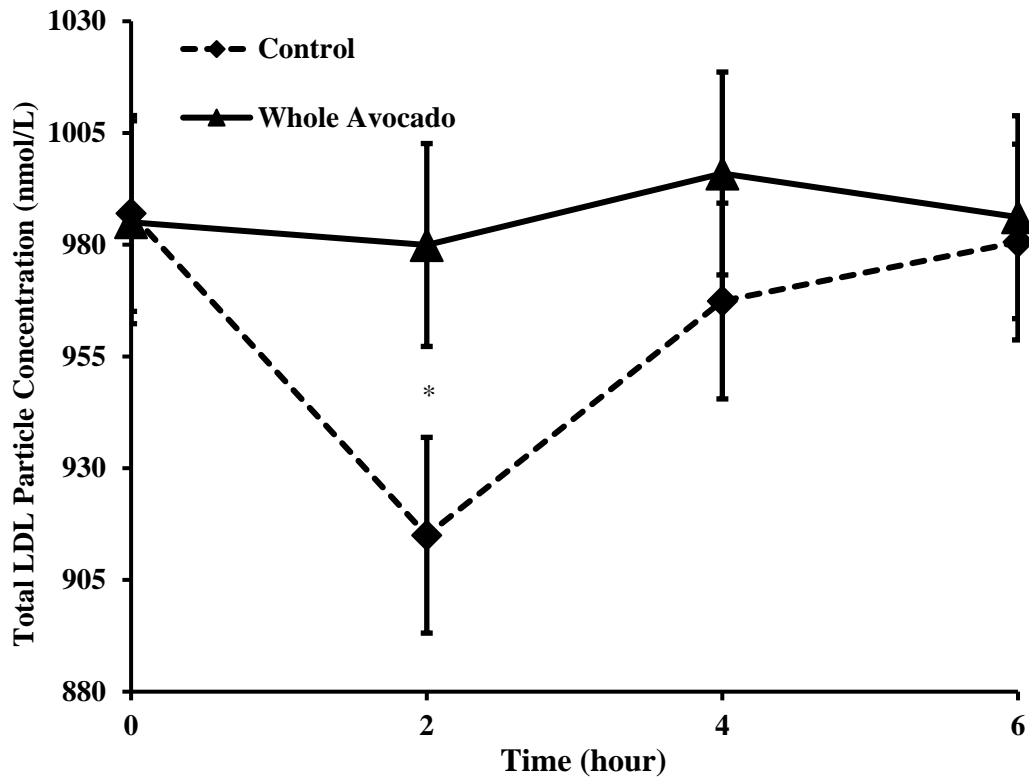

**Figure S2.** Plasma total LDL particle concentrations over 6 h after consuming test breakfast meals (n=31). Data were analyzed by PROC MIXED using SAS 9.4. Main effects of meal  $p=0.07$ , time  $p=0.13$ , and meal by time  $p=0.278$ .

Data are means  $\pm$  SE, n=31. \*  $p<0.05$  for the difference compared to the Control meal.

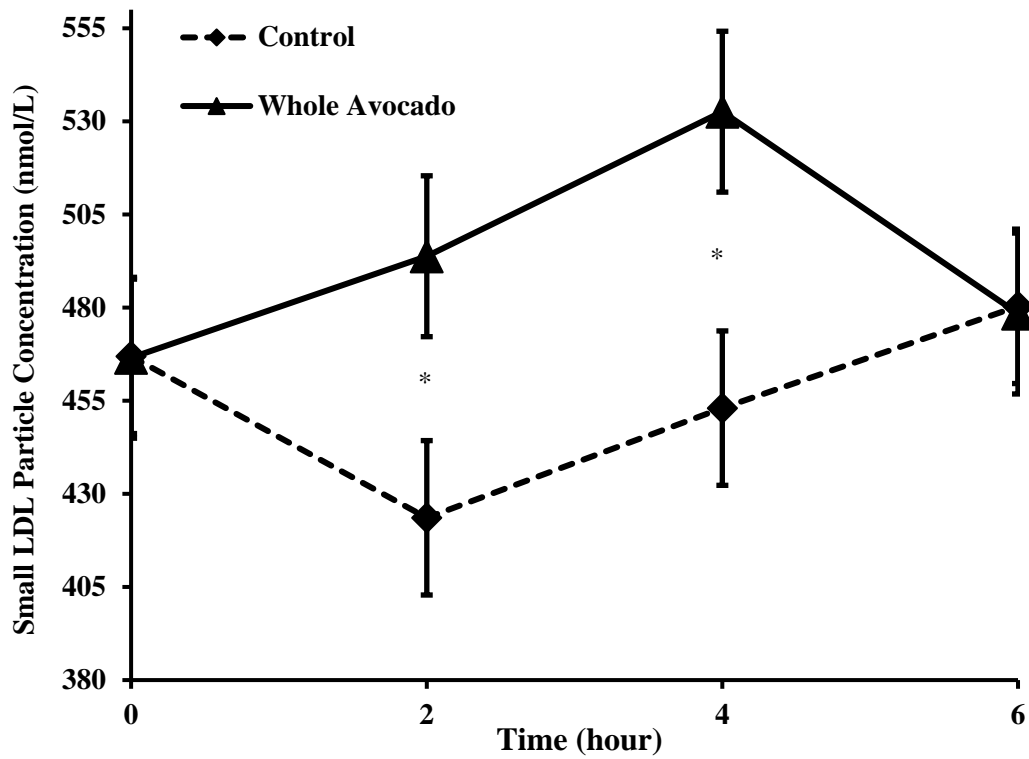

**Figure S3.** Plasma small LDL particle concentrations over 6 h after consuming test breakfast meals (n=31). Data were analyzed by PROC MIXED using SAS 9.4. Main effects of meal  $p=0.009$ , time  $p=0.32$ , and meal by time  $p=0.06$ .

Data are means  $\pm$  SE, n=31. \*  $p<0.05$  for the difference compared to the Control meal.

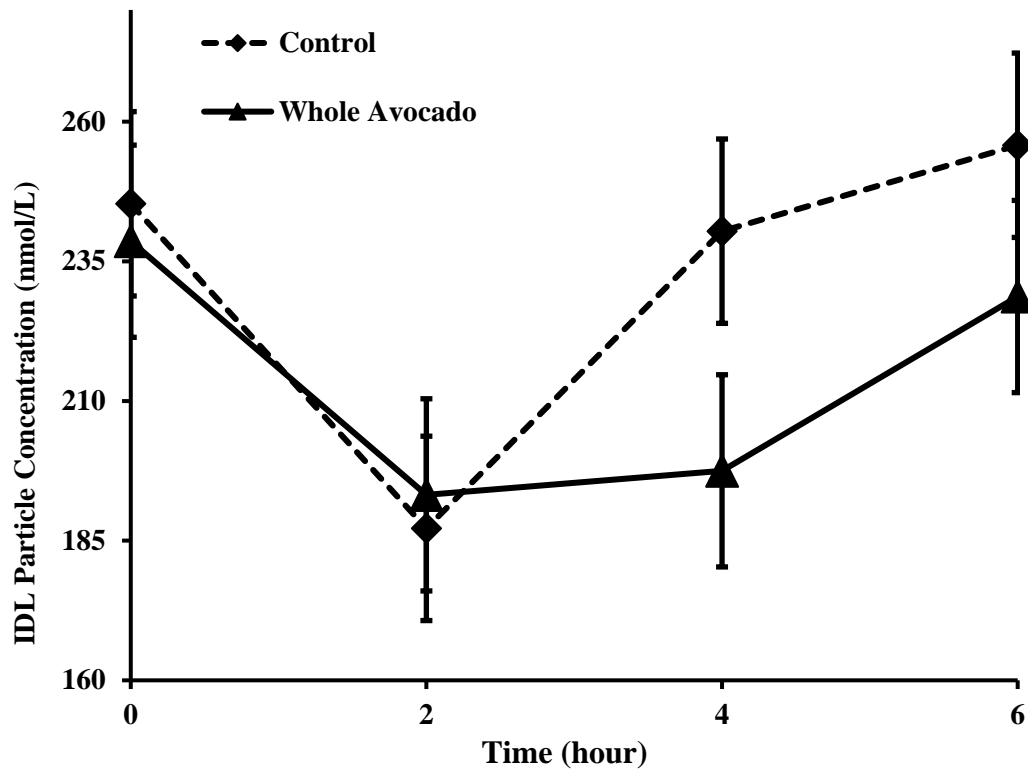

**Figure S4.** Plasma IDL particle concentrations over 6 h after consuming test breakfast meals (n=31). Data were analyzed by PROC MIXED using SAS 9.4. Main effects of meal  $p=0.004$ , time  $p=0.024$ , and meal by time  $p=0.013$ .

Data are means  $\pm$  SE, n=31.

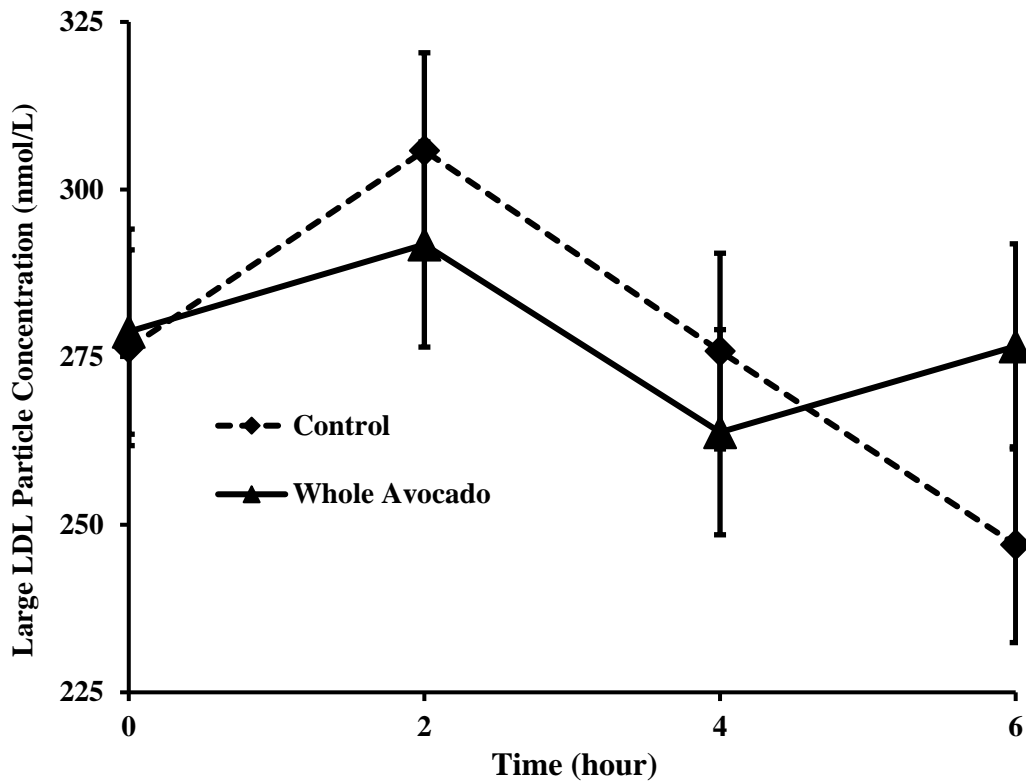

**Figure S5.** Plasma large LDL particle concentrations over 6 h after consuming test breakfast meals (n=31). Data were analyzed by PROC MIXED using SAS 9.4. Main effects of meal  $p=0.87$ , time  $p=0.032$ , and meal by time  $p=0.32$ .

Data are means  $\pm$  SE, n=31.

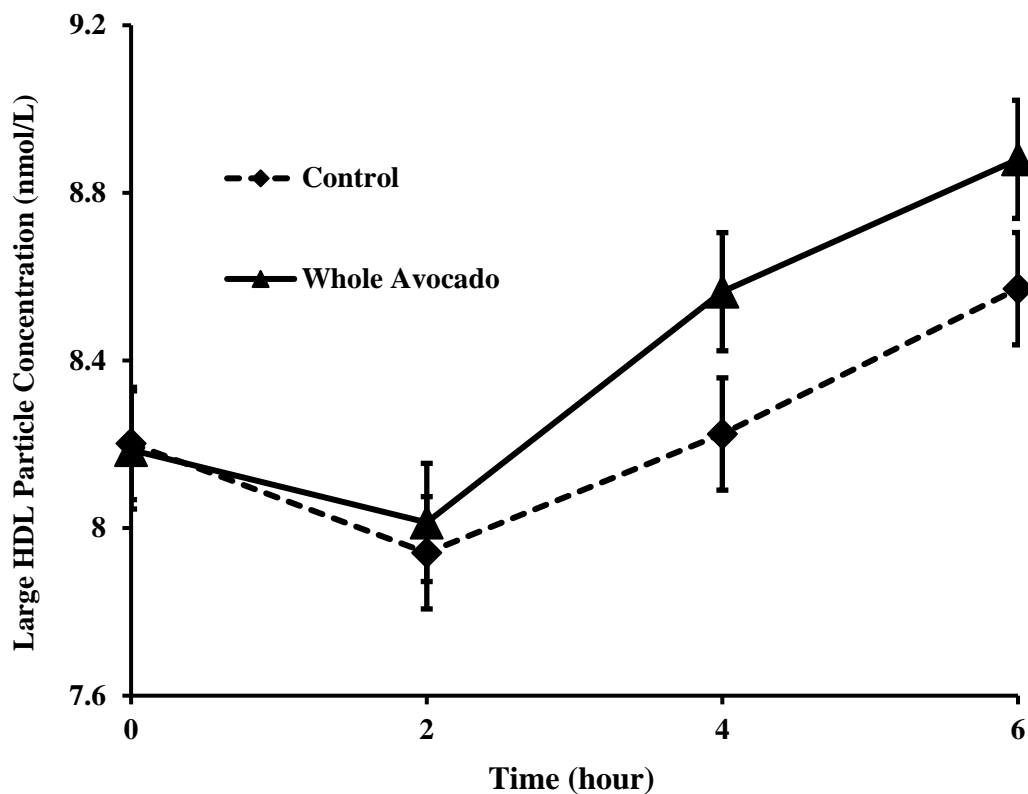

**Figure S6.** Plasma large HDL particle concentrations over 6 h after consuming test breakfast meals (n=31). Data were analyzed by PROC MIXED using SAS 9.4. Main effects of meal  $p=0.06$ , time  $p<0.0001$ , and meal by time  $p=0.43$ .

Data are means  $\pm$  SE, n=31.



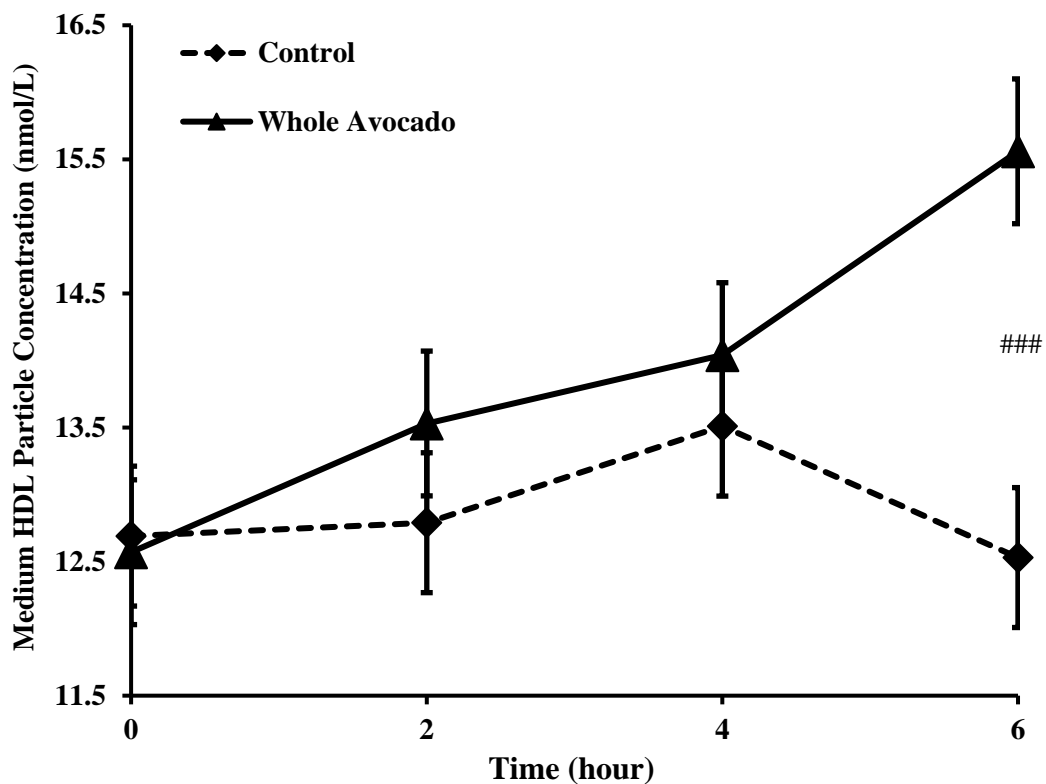

**Figure S7.** Plasma medium HDL particle concentrations over 6 h after consuming test breakfast meals (n=31). Data were analyzed by PROC MIXED using SAS 9.4. Main effects of meal  $p=0.004$ , time  $p=0.024$ , and meal by time  $p=0.013$ .

Data are means  $\pm$  SE, n=31. ###  $p<0.0001$  for the difference compared to the Control meal.

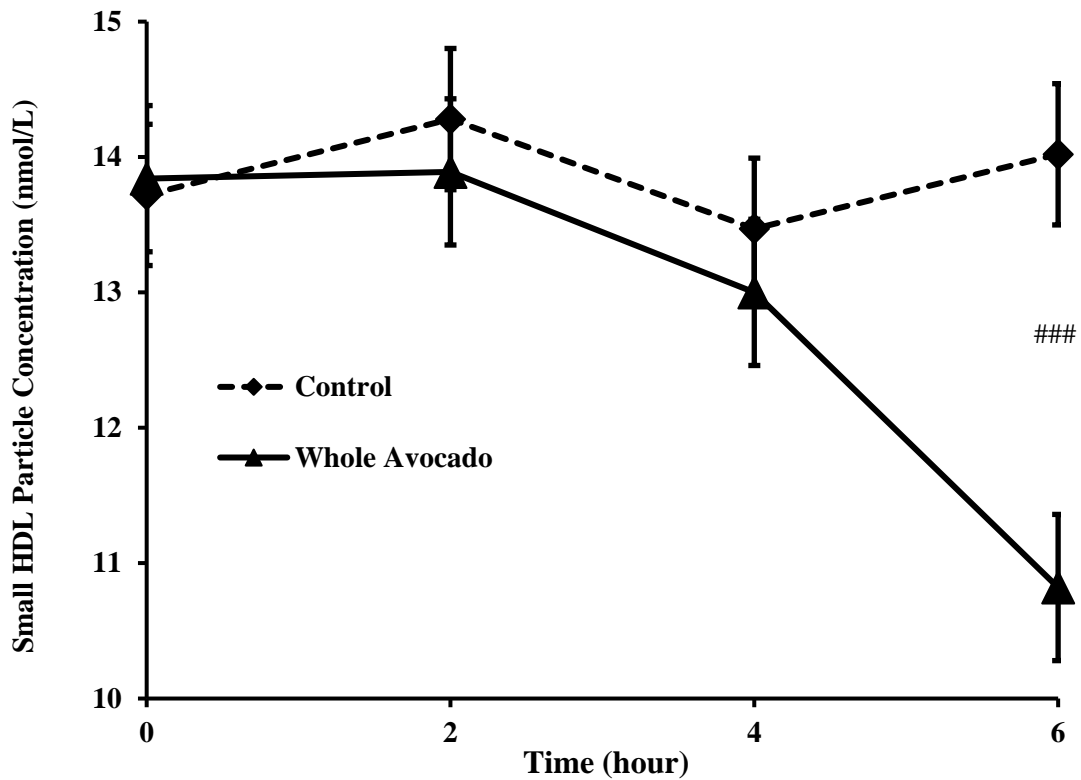

**Figure S8.** Plasma small HDL particle concentrations over 6 h after consuming test breakfast meals (n=31). Data were analyzed by PROC MIXED using SAS 9.4. Main effects of meal  $p=0.009$ , time  $p=0.011$ , and meal by time  $p=0.009$ .

Data are means  $\pm$  SE, n=31. ###  $p<0.0001$  for the difference compared to the Control meal.
